# Supplementary material for: Enhanced sol–gel polymerization of organoallylsilanes by solvent effect
Source: Royal Society of Chemistry journal article supplement (doi:10.1039/c1jm11565k), 2011-01-01
Supplement: c1jm11565k.pdf [file c1jm11565k.pdf]

## Electronic Supplementary Information

### Enhanced sol-gel polymerization of organoallylsilanes by solvent effect

Yoshifumi Maegawa,<sup>a,b</sup> Norihiro Mizoshita,<sup>a,b</sup> Takao Tani,<sup>a,b</sup> Toyoshi Shimada,<sup>b,c</sup> and Shinji Inagaki<sup>\*a,b</sup>

<sup>a</sup> *Toyota Central R&D Laboratories, Inc., Nagakute, Aichi 480-1192, Japan.*

<sup>b</sup> *Core Research for Evolutional Science and Technology (CREST), Japan Science and Technology Agency (JST),  
Kawaguchi, Saitama 332-0012, Japan*

<sup>c</sup> *Department of Chemical Engineering, Nara National College of Technology, 22 Yata-cho, Yamatokoriyama,  
Nara 639-1080, Japan.*

### Contents

|                                                                                                                |             |
|----------------------------------------------------------------------------------------------------------------|-------------|
| <b>1. Observation of sol-gel polymerization behaviors of 1a and 1b by <sup>1</sup>H NMR spectroscopy</b>       | <b>S2-5</b> |
| <b>2. Identification of the generated gas during sol-gel polymerization of 1a and 1b</b>                       | <b>S6</b>   |
| <b>3. Sol-gel polymerization of 1a in other organic solvents</b>                                               | <b>S7</b>   |
| <b>4. Relationship between initial deallylation rate <math>\nu_0</math> of 1a and other solvent parameters</b> | <b>S8</b>   |
| <b>5. References</b>                                                                                           | <b>S8</b>   |

# 1. Observation of sol-gel polymerization behaviors of **1a** and **1b** by $^1\text{H}$ NMR spectroscopy

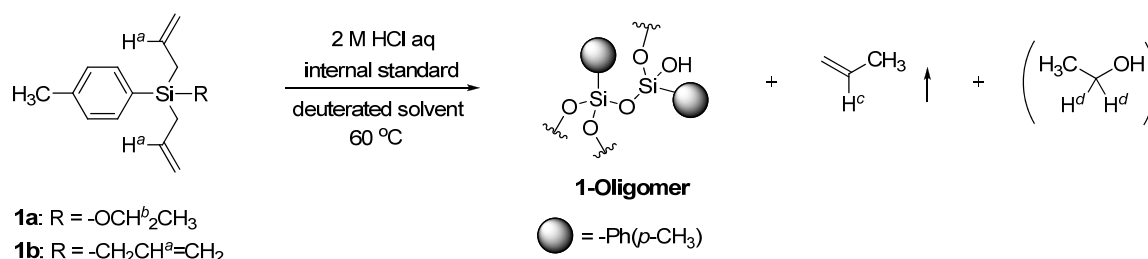

**Scheme S1** Acid-catalyzed sol-gel polymerization of **1a** and **1b**. The protons  $\text{H}^a$ ,  $\text{H}^b$ ,  $\text{H}^c$  and  $\text{H}^d$  were monitored by  $^1\text{H}$  NMR spectroscopy.

Conversion of the allyl groups in the organoallylsilane precursors **1a** and **1b** during the reactions was monitored by  $^1\text{H}$  NMR spectroscopy. The measurements were carried out for their sol-solutions containing internal standards (1,4-dichlorobenzene: DCB or naphthalene: Nap). Figs. S1-S6 show the  $^1\text{H}$  NMR spectra of **1a** or **1b** in various deuterated solvents at 0 min, 10 min and 4 h after the addition of HCl. In the figures, the letters (*a*, *b*, *c*, and *d*) indicate the signals corresponding to the protons shown in Scheme 1.

For **1a**, the signals corresponding to the proton *b* completely disappeared along with the appearance of the signals corresponding to the proton *d* within 10 min for all the solvents (Figs. S1-S5), which indicates that the ethoxy group in **1a** is immediately converted to ethanol regardless of the nature of solvents. In contrast, the nature of solvents strongly affected the deallylation rate of **1a**. After 4 h, intensities of the signals corresponding to the proton *a* decreased by 100% for MeCN (Fig. S1), 76% for acetone (Fig. S2) and less than 30% for MeOH, THF, and DMSO (Figs. S3-S5). Weak signals at the similar positions after 4 h for MeCN were identified as the proton *c* of propene dissolved in the solvents.

MeCN was also effective for deallylation of **1b** and the signals corresponding to the proton *a* completely disappeared within 4 h (Fig. S6a). Meanwhile, 80% of the allyl groups remained after 4 h for acetone (Fig. S6b).

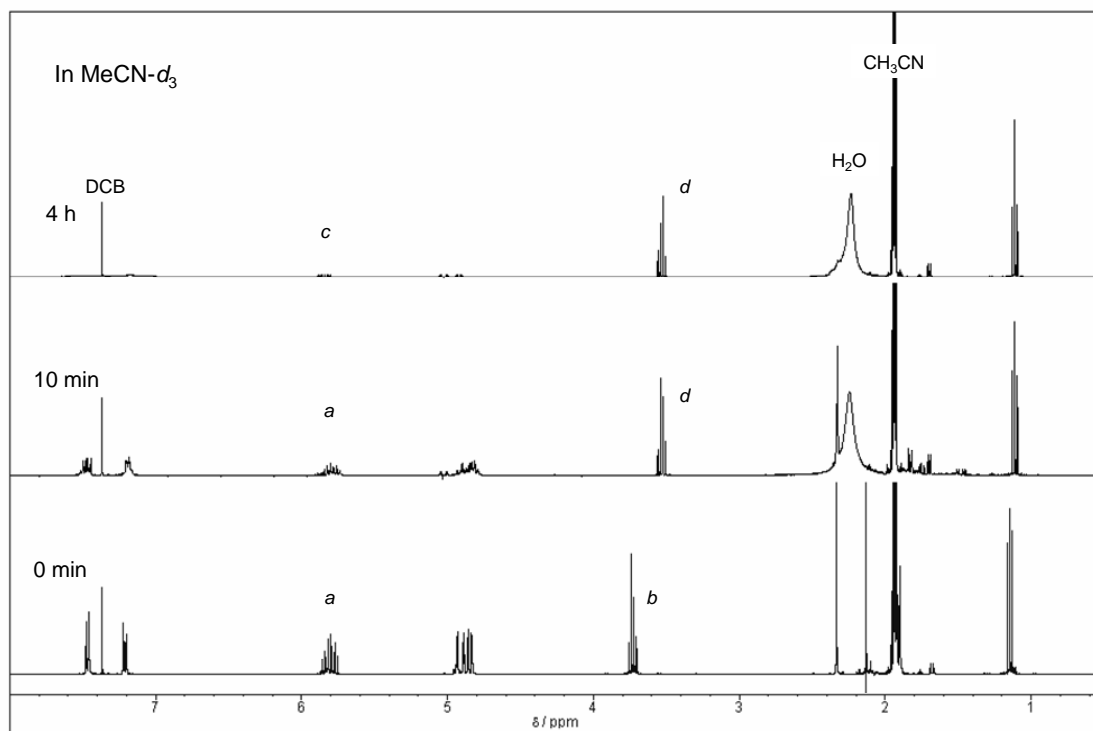

**Fig. S1**  $^1\text{H}$  NMR spectra of the sol-solution of **1a** in  $\text{MeCN-}d_3$  at 0 min, 10 min and 4 h after the addition of HCl.

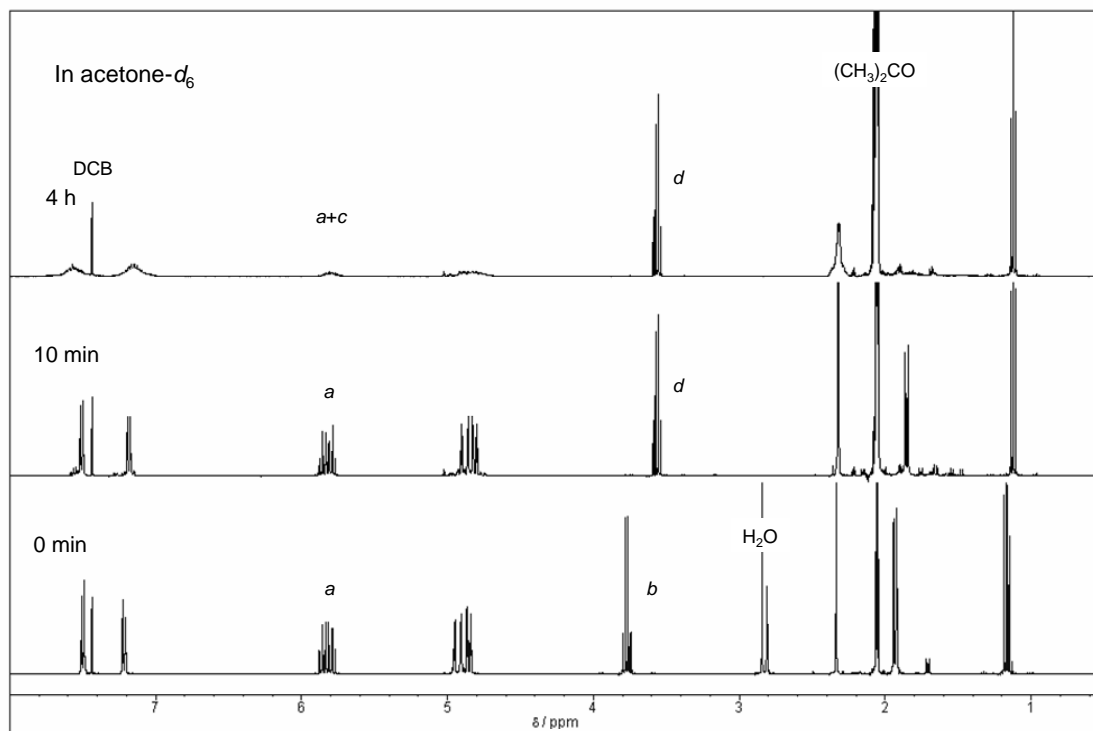

**Fig. S2**  $^1\text{H}$  NMR spectra of the sol-solution of **1a** in  $\text{acetone-}d_6$  at 0 min, 10 min and 4 h after the addition of HCl.

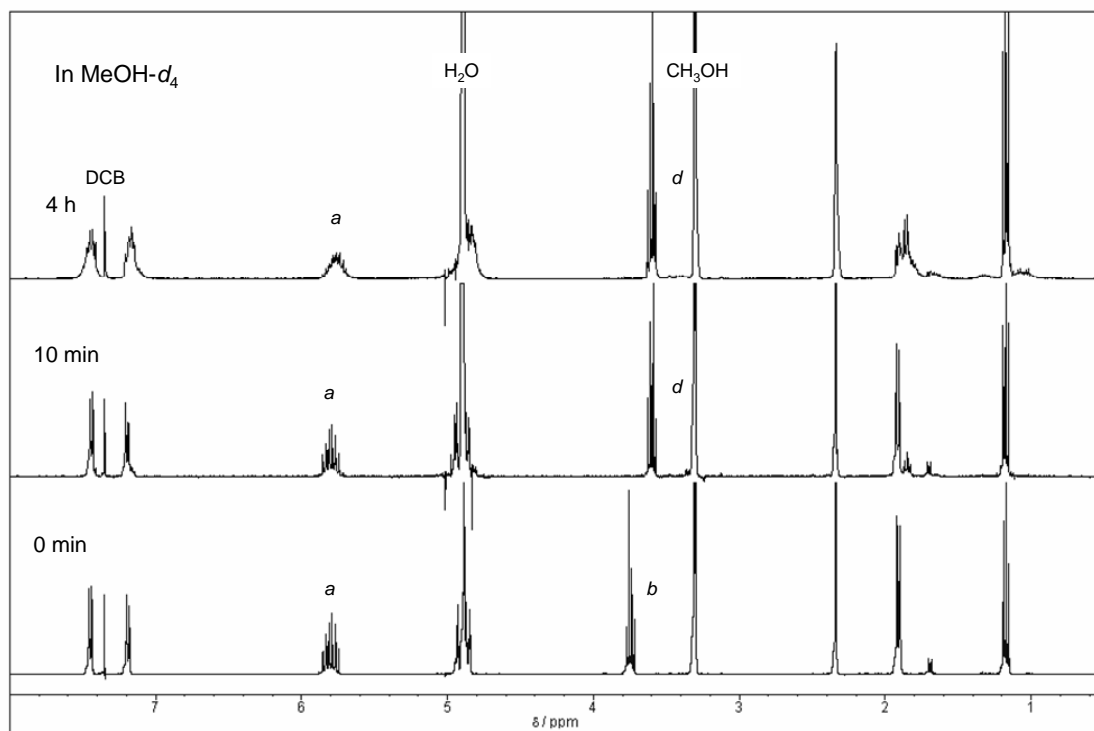

**Fig. S3**  $^1\text{H}$  NMR spectra of the sol-solution of **1a** in  $\text{MeOH-}d_4$  at 0 min, 10 min and 4 h after the addition of HCl.

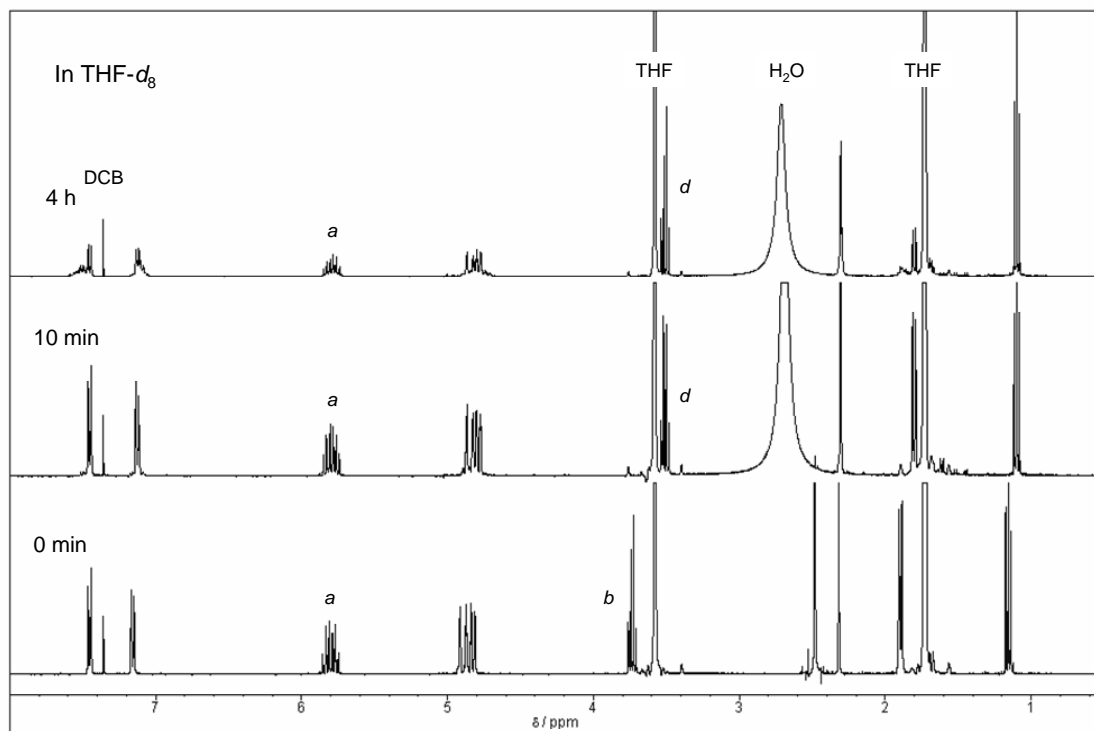

**Fig. S4**  $^1\text{H}$  NMR spectra of the sol-solution of **1a** in  $\text{THF-}d_8$  at 0 min, 10 min and 4 h after the addition of HCl.

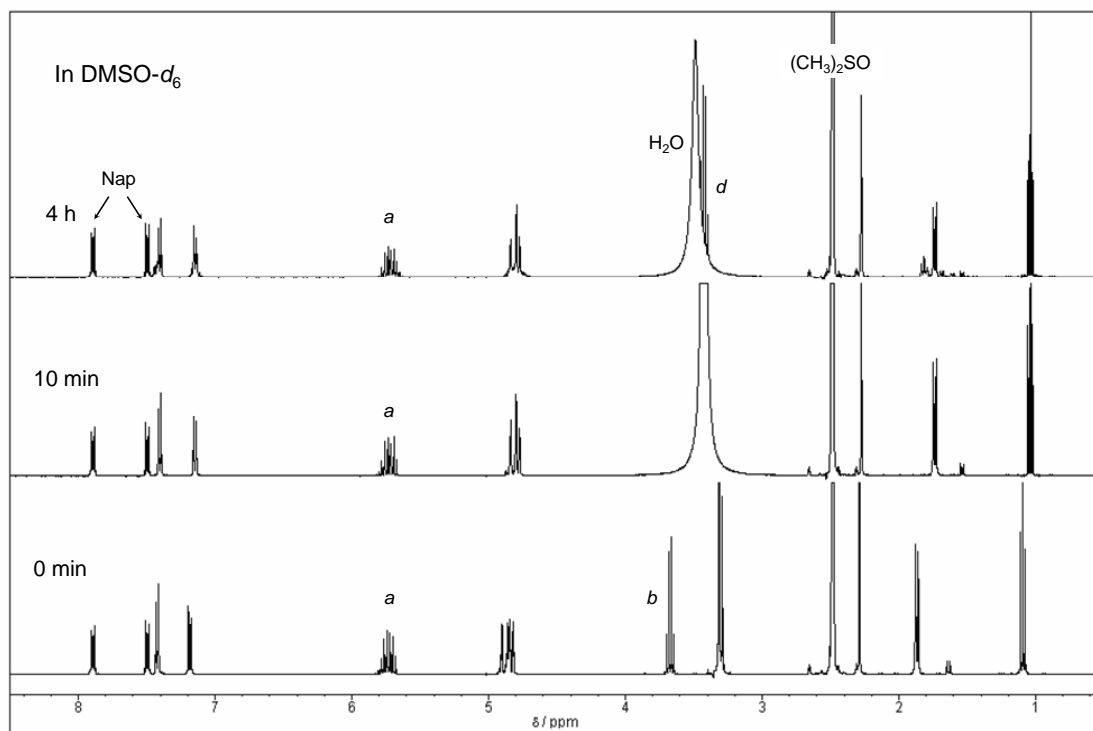

**Fig. S5**  $^1\text{H}$  NMR spectra of the sol-solution of **1a** in  $\text{DMSO-}d_6$  at 0 min, 10 min and 4 h after the addition of HCl.

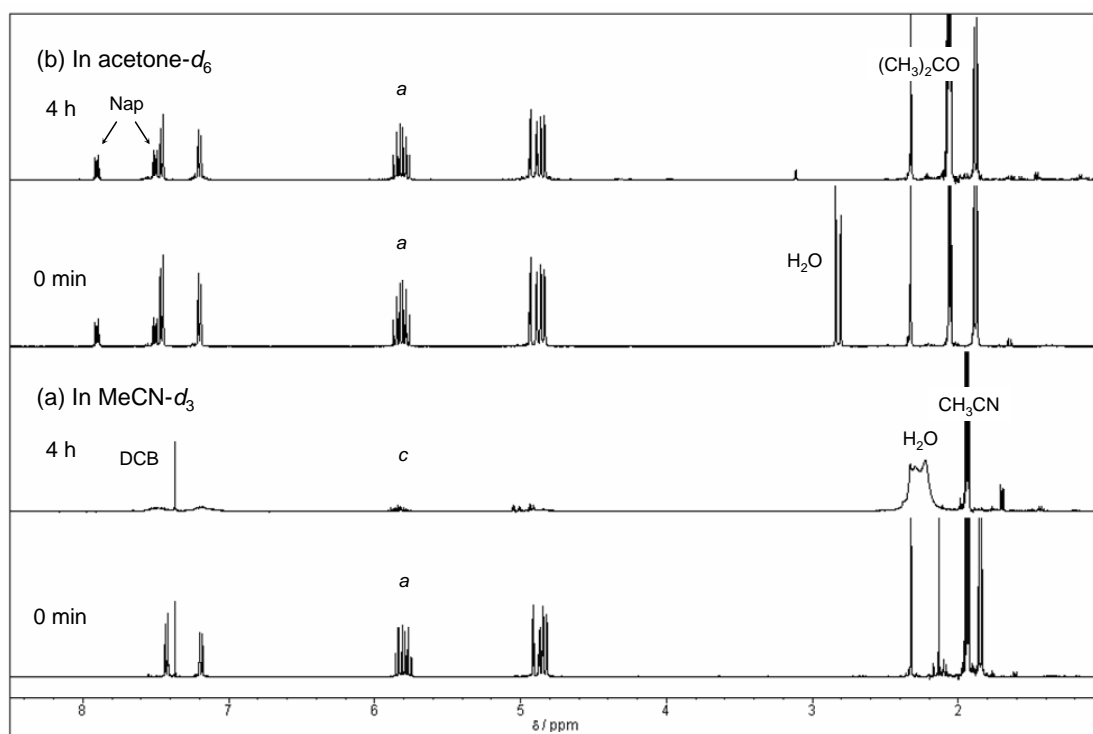

**Fig. S6**  $^1\text{H}$  NMR spectra of the sol-solutions of **1b** in (a)  $\text{MeCN-}d_3$  and (b)  $\text{acetone-}d_6$  at 0 min and 4 h after the addition of HCl.

## 2. Identification of the generated gas during sol-gel polymerization of **1a** and **1b**

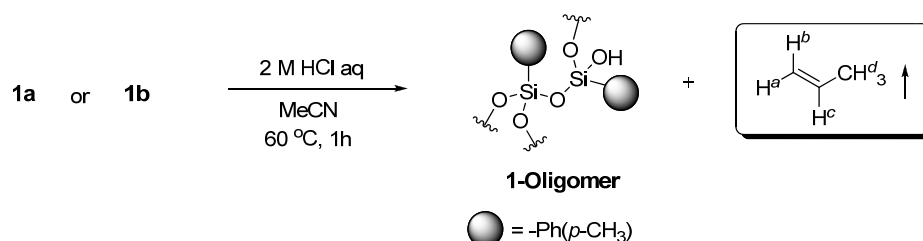

**Scheme S2** Generation of propene during acid-catalyzed sol-gel polymerization of **1a** and **1b**.

The generated gas during acid-catalyzed sol-gel polymerization of **1a** and **1b** was identified by  $^1\text{H}$  NMR spectroscopy (Scheme S2). A 50 mL, one-necked, round-bottomed flask equipped with a magnetic stirring bar was sequentially charged with **1a** or **1b** (250 mg, 1.0 mmol) and MeCN (2.50 mL). After addition of a 2 M HCl aqueous solution (0.25 mL, 0.50 mmol), the flask was capped with a septum and stirred at 60  $^\circ\text{C}$  for 1 h (*Caution!:* the increased inner pressure may blow out the septum). The gas phase in the flask was collected with a syringe and passed through MeCN- $d_3$ . The solution was immediately characterized by  $^1\text{H}$  NMR spectroscopy (Fig. S1). The generated gas was identified as propene.<sup>1</sup>

$^1\text{H}$  NMR (400 MHz, MeCN- $d_3$ )  $\delta$  1.70 (ddd,  $J$  = 6.4 Hz, 1.7 Hz, 1.4 Hz, 3H), 4.93 (ddq,  $J$  = 10.1 Hz, 2.2 Hz, 1.4 Hz, 1H), 5.04 (ddq,  $J$  = 16.6 Hz, 2.2 Hz, 1.7 Hz, 1H), 5.85 (ddq,  $J$  = 16.6 Hz, 10.1 Hz, 6.4 Hz, 1H).

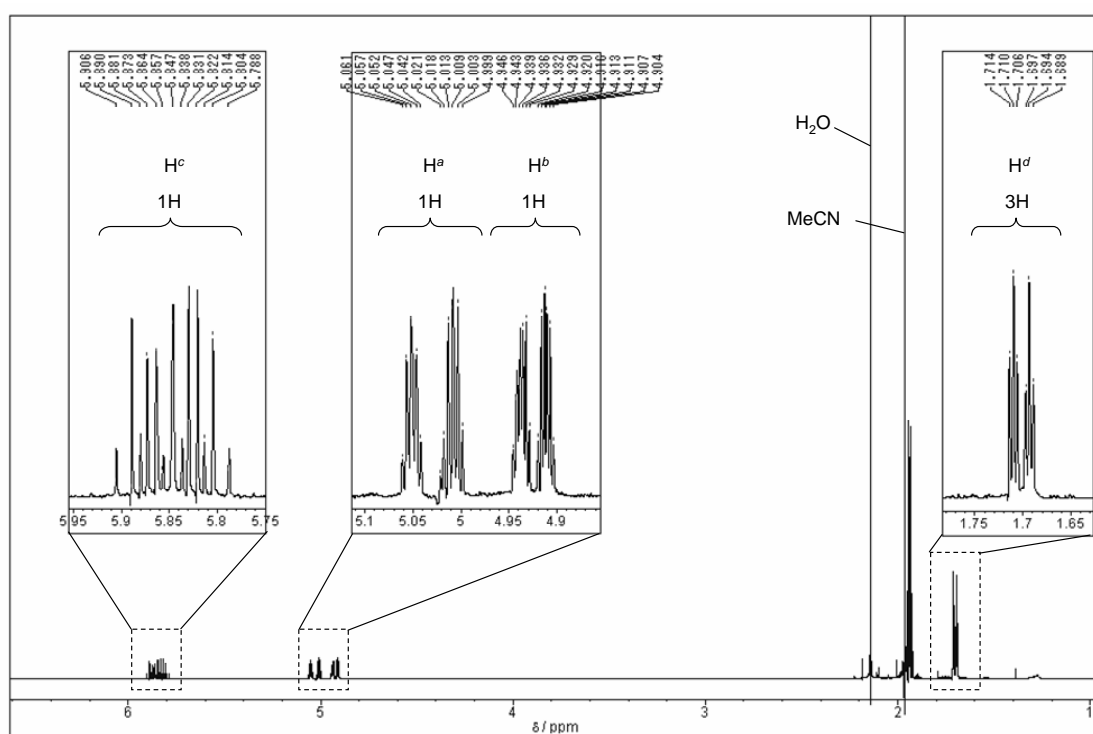

**Fig. S7**  $^1\text{H}$  NMR spectrum of the generated gas dissolved in MeCN- $d_3$ .

### 3. Sol-gel polymerization of **1a** in other organic solvents

We investigated the sol-gel polymerization behaviors of **1a** in other organic solvents to further confirm that SB rather than  $D_C$  or AN is the key factor of the reaction. *N,N*-dimethylformamide (DMF; SB: 0.614,  $D_C$ : 35.9, AN: 16.0) and a mixed solvent of 2,2,2-trifluoroethanol (TFE; SB: 0.107,  $D_C$ : 26.7, AN: 53.3)/THF (10:1) were newly selected and the sol-gel polymerization were carried out under 0.2 M HCl concentration for this purpose. The use of DMF did not form a solid organosilica film from the sol solution of **1a** even after stirring for 24 h. In contrast, the use of TFE/THF formed a solid organosilica film after stirring for only 1 h.

These experimental results and relationship between the SB and  $D_C$  or AN value were plotted, respectively (Fig. S8). As shown in Figs. S8a and S8b, the use of low SB solvents was found to be effective for the reaction regardless of  $D_C$  and AN values (MeCN vs DMF or THF, and TFE/THF vs MeCN). In addition, it should be noted that the use of high SB solvents is ineffective for the reaction regardless of  $D_C$  and AN values (DMF, MeOH and THF). These results clearly indicate that that SB is the key factor of the reaction rather than  $D_C$  or AN.

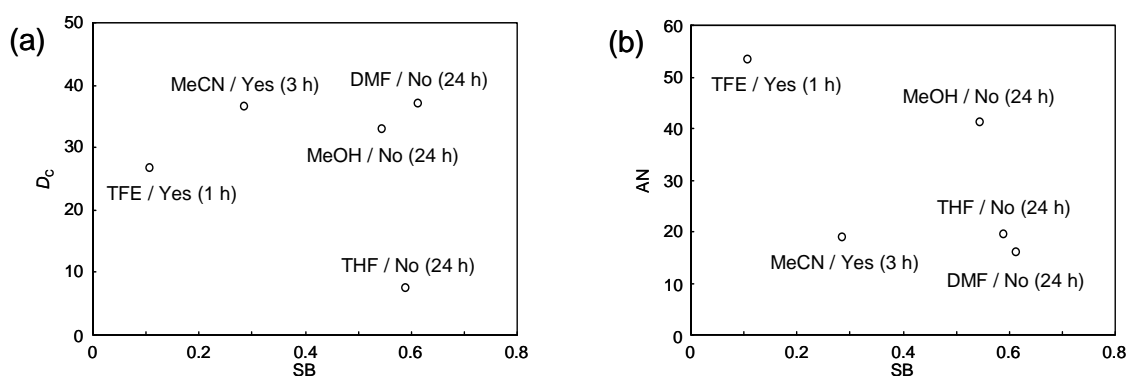

**Fig. S8** Plots of (a)  $D_C$  and (b) AN vs. SB for DMF, TFE, MeCN, MeOH and THF. “Yes (X h)” and “No (X h)” denotes whether a solid organosilica film was formed or not from the sol solutions of **1a** using the corresponding solvents after stirring for X h.

#### 4. Relationship between initial deallylation rate $v_0$ of **1a** and other solvent parameters

The initial deallylation rate  $v_0$  of **1a** was plotted against Gutmann's donor number (DN: an index of Lewis basicity)<sup>2</sup> and Dimroth-Reichardt's  $E_T^N$  value (an index of solvent polarity)<sup>3</sup> (Fig. S9) in addition to Catalán solvent basicity (SB), dielectric constant ( $D_C$ ) and Gutmann's acceptor number (AN) (Fig. 4 in the main text). Apparent correlation was observed for  $v_0$  vs DN, but not for  $v_0$  vs  $E_T^N$  value.

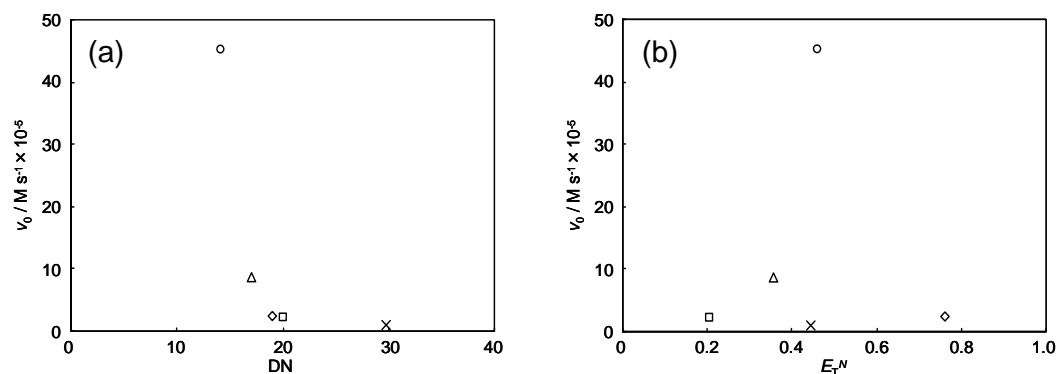

**Fig. S9** Relationships between the initial deallylation rate ( $v_0$ ) of **1a** and (a) Gutmann's donor number (DN) or (b) Dimroth-Reichardt's  $E_T^N$  value. Solvents were labelled as follows: MeCN (O); acetone ( $\Delta$ ); MeOH ( $\diamond$ ); THF ( $\square$ ); and DMSO ( $\times$ ).

#### 5. References

- (1) G. R. Fulmer, A. J. M. Miller, N. H. Sherden, H. E. Gottlieb, A. Nudelman, B. M. Stoltz, J. E. Bercaw and K. I. Goldberg, *Organometallics*, 2010, **29**, 2176.
- (2) V. Gutmann, *Coord. Chem. Rev.* **1976**, *19*, 225.
- (3) C. Reichardt, *Chem. Rev.*, **1994**, *94*, 2319.
